# Supplementary material for: Quantification of tumour-infiltrating immune cells through deconvolution of DNA methylation data in Ewing sarcomas
Source: Frontiers journal article supplement (doi:10.3389/freae.2024.1427399), 2024-09-04
Supplement: Table_1.xlsx [file Table_1.xlsx]

## Sheet: Supplementary Table 1
Case #	Primary/relapse	Frontline chemotherapy	Histological review of TIICs	TIIC score	Necrosis/haemorragy score	Fibrosis score	Total infiltration score	Translocation	Overall survival (years)	Mon	Dendritic	Macro	Neu	Eos	Treg	Tnaive	Tmem	CD8	NK	Bcell	abs_Mon	abs_Dendritic	abs_Macro	abs_Neu	abs_Eos	abs_Treg	abs_Tnaive	abs_Tmem	abs_CD8	abs_NK	abs_Bcell	Purity
2	primary	NA						EWSR1::FLI1		0	0	0	0.261254	0.0193266	0	0.219492	0.324513	0	0.175414	0	0	0	0	0.0442253	0.00327162	0	0.0371556	0.0549338	0	0.0296942	0	0.830719
3	primary	AIEOP EW1	3-4%	2	1	1	4	EWSR1::FLI1	1.58333	0	0	0	0	0.063842	0	0.227094	0.534832	0.174232	0	0	0	0	0	0	0.0086619	0	0.0308115	0.0725644	0.0236393	0	0	0.864323
4	primary	AIEOP EW1	<1%	0	1	1	2	EWSR1::FLI1	4.16667	0	0	0	0.168393	0	0	0.297486	0.370978	0	0.163142	0	0	0	0	0.0273925	0	0	0.0483919	0.0603468	0	0.0265383	0	0.837331
5	primary	AIEOP EW1	0.01	1	0	0	1	EWSR1::FLI1	1.41667	0.145092	0	0	0.225687	0	0	0.189613	0.384136	0	0.0554718	0	0.0226516	0	0	0.0352339	0	0	0.0296023	0.0599709	0	0.00866019	0	0.843881
6	primary	AIEOP EW1	0.01	1	0	0	1	EWSR1::FLI1	4.25	0	0	0	0.0566547	0	0	0.235898	0.707447	0	0	0	0	0	0	0.00773976	0	0	0.0322267	0.0966463	0	0	0	0.863387
7	primary	AIEOP EW1	0.01	1	0	0	1	EWSR1::FLI1	3.75	0	0	0.0977315	0	0.0446859	0	0.281447	0.385065	0	0.19107	0	0	0	0.0128034	0	0.00585411	0	0.0368712	0.0504458	0	0.0250313	0	0.868994
8	primary	AIEOP EW1	0.15	3	0	0	3	EWSR1::FLI1	2.08333	0.318166	0	0	0.199034	0	0	0.17686	0.305941	0	0	0	0.0473788	0	0	0.0296386	0	0	0.0263366	0.0455584	0	0	0	0.851088
9	primary	AIEOP EW1	0.05	2	1	1	4	EWSR1::FLI1	4.91667	0	0.138478	0	0.0483472	0	0	0.197607	0.496119	0	0.119448	0	0	0.0197798	0	0.00690577	0	0	0.0282257	0.0708643	0	0.0170617	0	0.857163
10	primary	NA	0.05	2	1	1	4	EWSR1::FLI1		0	0	0	0.136341	0	0	0.319474	0.400829	0	0.143356	0	0	0	0	0.0195196	0	0	0.0457383	0.0573858	0	0.020524	0	0.856832
11	primary	NA	1-2%	1	0	1	2	EWSR1::FLI1		0.295256	0	0	0.205861	0	0	0.262751	0.133579	0	0.102552	0	0.045152	0	0	0.0314812	0	0	0.0401811	0.0204276	0	0.0156828	0	0.847075
12	primary	AIEOP EW1	<1%	0	1	0	1	EWSR1::FLI1	0.0833333	0	0	0	0.156517	0	0	0.141538	0.537627	0	0.164318	0	0	0	0	0.0240014	0	0	0.0217043	0.0824434	0	0.0251977	0	0.846653
14	primary	AIEOP EW1	Not evaluable	0	1	0	1	EWSR1::FLI1	0.583333	0.500088	0	0	0.0427477	0.0198554	0	0.139689	0.156007	0	0.141613	0	0.0646013	0	0	0.00552213	0.00256492	0	0.018045	0.0201529	0	0.0182935	0	0.87082
15	unknown	NA	1-2%	1	1	1	3	EWSR1::FLI1		0	0	0	0	0.198964	0	0.26687	0.258999	0	0.21646	0.0587083	0	0	0	0	0.0207809	0	0.0278734	0.0270512	0	0.0226082	0.00613182	0.895554
16	primary	NA	<1%	0	1	1	2	EWSR1::FLI1		0	0	0	0.359405	0	0	0.396277	0.237903	0	0.00641455	0	0	0	0	0.058649	0	0	0.0646658	0.0388219	0	0.00104675	0	0.836817
17	primary	NA	0.02	1	0	1	2	EWSR1::FLI1		0	0.221506	0	0.369424	0.0400749	0	0.0717121	0.297282	0	0	0	0	0.0331387	0	0.0552681	0.00599545	0	0.0107286	0.0444753	0	0	0	0.850394
18	primary	NA					0	EWSR1::FLI1		0.011674	0.0954801	0	0.103202	0.0615733	0	0.215578	0.426857	0.0429568	0.0426786	0	0.00157775	0.0129043	0	0.0139479	0.0083217	0	0.0291357	0.0576902	0.00580566	0.00576806	0	0.864849
20	primary	AIEOP EW1	1-2%	1	1	1	3	EWSR1::FLI1	1.25	0.0884884	0.269798	0	0.0876544	0.117243	0	0.0317375	0.331391	0.0731389	0.000549318	0	0.00822271	0.0250707	0	0.00814521	0.0108947	0	0.00294918	0.0307942	0.00679637	5.1045e-05	0	0.907076
21	relapse	AIEOP EW1, Temiri + ifosfamide	1-2%	1	1	1	3	EWSR1::FLI1	1.16667	0	0	0	0	0.276222	0	0.213837	0.509941	0	0	0	0	0	0	0	0.0253789	0	0.0196471	0.0468527	0	0	0	0.908121
22	primary	EW Oss Recc	2-3%	1	1	1	3	EWSR1::FLI1	1.08333	0.0347661	0	0	0	0.0989734	0	0.355034	0.214863	0	0.296363	0	0.00387771	0	0	0	0.0110392	0	0.0395994	0.0239652	0	0.0330554	0	0.888463
23	primary	EW Oss Recc	Not evaluable	0	1	0	1	EWSR1::FLI1	0.833333	0.223851	0.0852165	0	0.0270819	0.0106452	0	0.213778	0.32138	0	0.118048	0	0.0299641	0.0114069	0	0.00362511	0.00142494	0	0.0286157	0.0430191	0	0.0158015	0	0.866143
25	primary	EW Oss Recc	1-2%	1	0	0	1	EWSR1::FLI1	0.666667	0	0	0	0.338491	0.0469149	0	0.29581	0.140625	0	0.178159	0	0	0	0	0.0529041	0.00733253	0	0.0462334	0.0219789	0	0.0278452	0	0.843706
26	primary	EW Oss Recc	0.01	1	0	1	2	EWSR1::FLI1	0.916667	0	0.220943	0	0.228555	0.0203202	0	0.0916367	0.428392	0	0.0101533	0	0	0.0361015	0	0.0373453	0.00332026	0	0.0149732	0.0699981	0	0.00165902	0	0.836603
27	primary	EW Oss Recc	3-4%	2	1	1	4	EWSR1::FLI1	0.666667	0	0	0	0.273934	0.165429	0	0.115495	0.445142	0	0	0	0	0	0	0.0290878	0.0175661	0	0.0122639	0.0472675	0	0	0	0.893815
28	primary	Euro Ewing 99	0.01	1	0	0	1	EWSR1::FLI1	2.58333	0	0	0	0	0.14959	0	0.204035	0.448859	0.0683481	0.129168	0	0	0	0	0	0.0166213	0	0.0226708	0.0498737	0.00759431	0.0143521	0	0.888888
29	primary	EW Oss Recc	<1%	0	0	0	0	EWSR1::FLI1	0.416667	0	0	0	0.144113	0.137901	0	0.30652	0.192921	0	0.218545	0	0	0	0	0.0153007	0.0146413	0	0.0325439	0.0204828	0	0.0232034	0	0.893828
30	primary	EW Oss Recc	0.01	1	0	0	1	EWSR1::FLI1	0.25	0	0	0	0.16434	0	0	0	0.43872	0.39694	0	0	0	0	0	0.0272791	0	0	0	0.072824	0.0658889	0	0	0.834008
31	primary	EW Oss Recc	20-30%	3	1	0	4	EWSR1::FLI1	0.5	0	0	0	0.0343154	0.15581	0	0.223455	0.308463	0	0.277957	0	0	0	0	0.00378138	0.0171694	0	0.0246236	0.0339909	0	0.0306293	0	0.889805
32	primary	AIEOP EW1	<1%	0	0	0	0	EWSR1::FLI1	4.83333	0	0.147311	0	0.218973	0	0	0.105675	0.402915	0.0576594	0.0674663	0	0	0.0266139	0	0.0395607	0	0	0.0190917	0.0727925	0.010417	0.0121888	0	0.819335
1	primary	NA	0.2	3	1	0	4	EWSR1::ETV4		0	0	0	0.291669	0	0	0.108906	0.463921	0	0.135504	0	0	0	0	0.0491664	0	0	0.0183582	0.0782028	0	0.0228418	0	0.831431
13	primary	AIEOP EW1	<1%	0	0	0	0	EWSR1::ERG	1.08333	0	0	0	0.250196	0	0	0.166366	0.569956	0	0.0134818	0	0	0	0	0.0406634	0	0	0.0270388	0.0926328	0	0.00219114	0	0.837474
19	primary	AIEOP EW1	0	0	0	0	0	EWSR1::ERG	0.583333	0.0690507	0	0	0.120079	0	0	0.239714	0.369591	0	0.201565	0	0.00976175	0	0	0.0169756	0	0	0.0338886	0.0522493	0	0.0284954	0	0.858629
24	primary	EW Oss Recc	1-2%	1	0	0	1	EWSR1::ETV4	0.833333	0	0	0	0	0.109491	0	0.26832	0.451728	0	0.170461	0	0	0	0	0	0.0118472	0	0.0290329	0.0488782	0	0.0184443	0	0.891797
								EWSR1::FLI1 vs Other Student's T-test (p-value)	0.0171842	0.184404	0.0107258	0.326189	0.710615	0.366423	#DIV/0!	0.793207	0.0832486	0.070228	0.543462	0.326189	0.193408	0.010323	0.326189	0.633192	0.340941	#DIV/0!	0.787985	0.181607	0.0943807	0.490708	0.326189	0.615933
								Mean all (percentage)	1.6875	0.052701	0.0368354	0.00305411	0.141008	0.0542769	0	0.205616	0.374904	0.0254149	0.104355	0.00183463	0.00728712	0.00515674	0.000400106	0.021355	0.00602145	0	0.0281007	0.0520494	0.00375442	0.0139645	0.000191619	0.861719
								Mean EWSR1::FLI1 (percentage)	1.80952	0.059903	0.0436568	0.00361969	0.132929	0.0595572	0	0.206552	0.363601	0.0301213	0.0978864	0.00217438	0.00827504	0.0061117	0.0004742	0.0197159	0.00657657	0	0.0279167	0.0495809	0.00444969	0.0127851	0.000227104	0.863887
								Mean Other (percentage)	0.833333	0.0172627	0	0	0.165486	0.0273727	0	0.195826	0.463799	0	0.130253	0	0.00244044	0	0	0.0267014	0.0029618	0	0.0270796	0.0679908	0	0.0179932	0	0.854833
