# Supplementary material for: Quantification of tumour-infiltrating immune cells through deconvolution of DNA methylation data in Ewing sarcomas
Source: Frontiers journal article supplement (doi:10.3389/freae.2024.1427399), 2024-09-04
Supplement: Table_2.xlsx [file Table_2.xlsx]

## Sheet: Supplementary Table 2
Cell type	Variable cutoff	Bonferroni p-value	Group with better prognosis
Mon	0.0347661	0.0977746	low	Mon
Dendritic	0.0852165	0.0886693	high	Dendritic
Macro				Macro
Neu	0.0427477	0.345634	high	Neu
Eos	0.0106452	0.599037	high	Eos
Treg				Treg
Tnaive	0.17686	0.170958	high	Tnaive
Tmem	0.509941	0.153153	low	Tmem
CD8	0.0576594	0.458985	low	CD8
NK	0.119448	0.207578	low	NK
Bcell				Bcell
abs_Mon	0.00822271	0.0464912	low	abs_Mon
abs_Dendritic	0.0114069	0.0886693	high	abs_Dendritic
abs_Macro				abs_Macro
abs_Neu	0.00552213	0.345634	high	abs_Neu
abs_Eos	0.00142494	0.599037	high	abs_Eos
abs_Treg				abs_Treg
abs_Tnaive	0.0368712	0.227722	high	abs_Tnaive
abs_Tmem	0.0204828	0.0452755	high	abs_Tmem
abs_CD8	0.00759431	0.813319	low	abs_CD8
abs_NK	0.0170617	0.289409	low	abs_NK
abs_Bcell				abs_Bcell
Purity	0.837331	0.10574	low	Purity
